# Supplementary material for: miR-497 and miR-34a retard lung cancer growth by co-inhibiting cyclin E1 (CCNE1)
Source: PubMed Central journal article supplement (PMC4537005; doi:10.18632/oncotarget.3693), 2015-03-29
Supplement: oncotarget-06-13149-s001.pdf [file oncotarget-06-13149-s001.pdf]

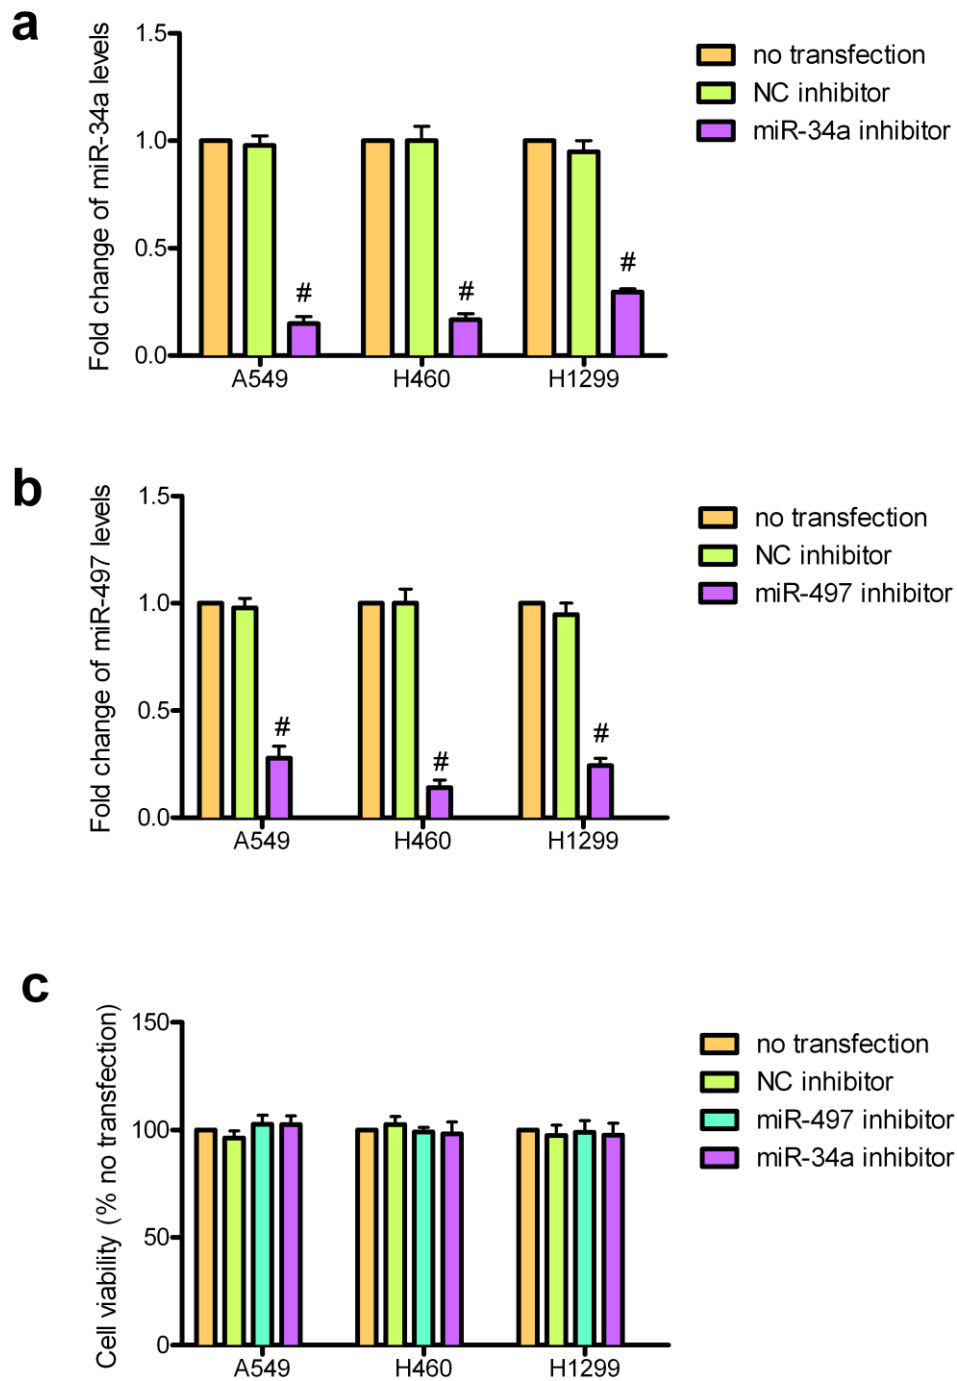

**Figure S1: Effect of miR-497 or miR-34a knockdown on cell proliferation.** The relative miR-497 (a) or miR-34a (b) levels in A549, H460, and H1299 cells were assessed with the TaqMan® MicroRNA Assay and are expressed as fold change after normalization to the internal control, U6B-snRNA. Mean  $\pm$  SD, n = 3 (#P < 0.01, all

vs. NC inhibitor). (c) A549, H460, and H1299 cells were transfected as described in the Methods section, and cell growth was monitored for 48 h using the CCK-8 assay. There were no differences among the groups. Mean  $\pm$  SD, n = 3.

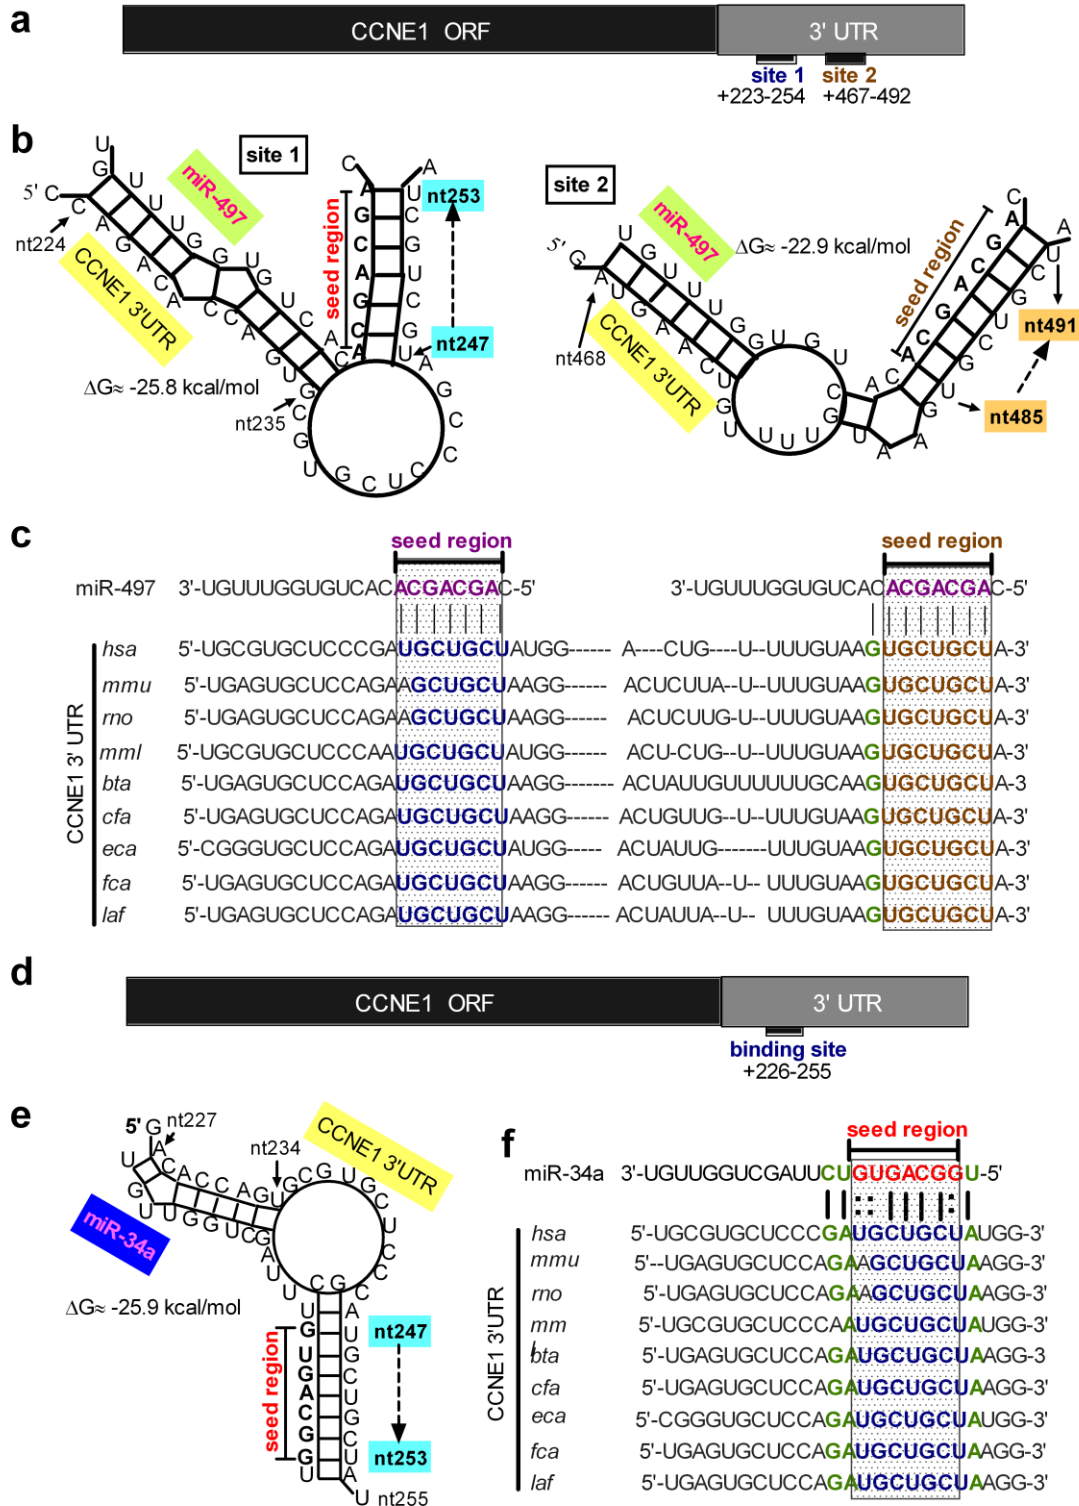

**Figure S2: Bioinformatics analysis of miR-497 and miR-34a target sequences in the CCNE1 3'-UTR.** (a) The locations of the two putative miR-497 target sites are shown. (b) Two putative binding sites and miR-497:CCNE1 RNA hybrids, as predicted from their minimum free energy ( $\Delta G$ ), are illustrated. (c) Comparison of the miR-497 seed sequence and its target sequences in nine species. (d) The location of the putative miR-34a target site is shown. (e) The putative binding site and miR-34a:CCNE1 RNA hybrid, as predicted from the  $\Delta G$ , are illustrated. (f) Comparison of the miR-34a seed sequence and its target sequences in nine species.

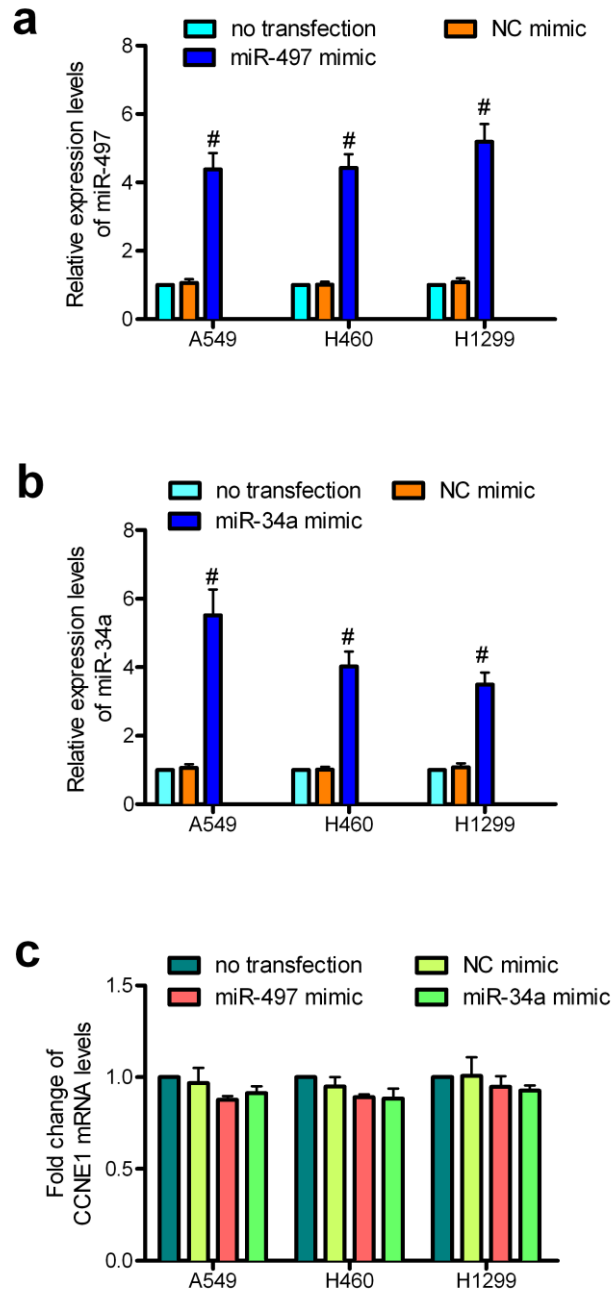

**Figure S3: Effect of miR-497 or miR-34a overexpression on CCNE1 mRNA levels.** The relative miR-34a (a) or miR-497 (b) levels in A549, H460, and H1299 cells were assessed with the TaqMan® MicroRNA Assay and are expressed as fold change after normalization to the internal control, U6B-snRNA. Mean  $\pm$  SD, n = 3 (#P < 0.01, all vs. NC mimic). (c) The relative CCNE1 mRNA levels in A549, H460, and H1299 cells were assessed by real-time qPCR and are expressed as fold change after normalization to the internal control, 18S rRNA. Mean  $\pm$  SD, n = 3.



construct the expression plasmids. The red region indicates the transcription start site. The magnified panel shows the locations of MIR497, MIR34A, or both precursors, which were subcloned into the pcDNA6.2-GW/EmGFP-miR vector. The isocaudomers BamHI and BglII were used to ligate MIR497 and MIR34A into the vector. (c) The partial sequences of the Hi-miR497 (top, in dark blue), Hi-miR34a (middle, in red), and Hi-miR497/34a (bottom row) vectors, which were confirmed by DNA sequencing, are shown. (d) A549 cells were transfected with the expression plasmid Hi-miR497, Hi-miR34a, or Hi-miR497/34a, generating Hi-miR497-a, Hi-miR34a-a, or Hi-miR497/34a-a cells, respectively. The empty pcDNA6.2-GW/EmGFP-miR vector was used as the negative control (mock), (original magnification,  $\times 40$ ). (e) The relative miR-497 and miR-34a levels were determined with the TaqMan® MicroRNA Assay and are expressed as fold change after normalization to the internal control, U6B-snRNA. Mean  $\pm$  SD, n = 3 (#P < 0.01, all vs. mock).



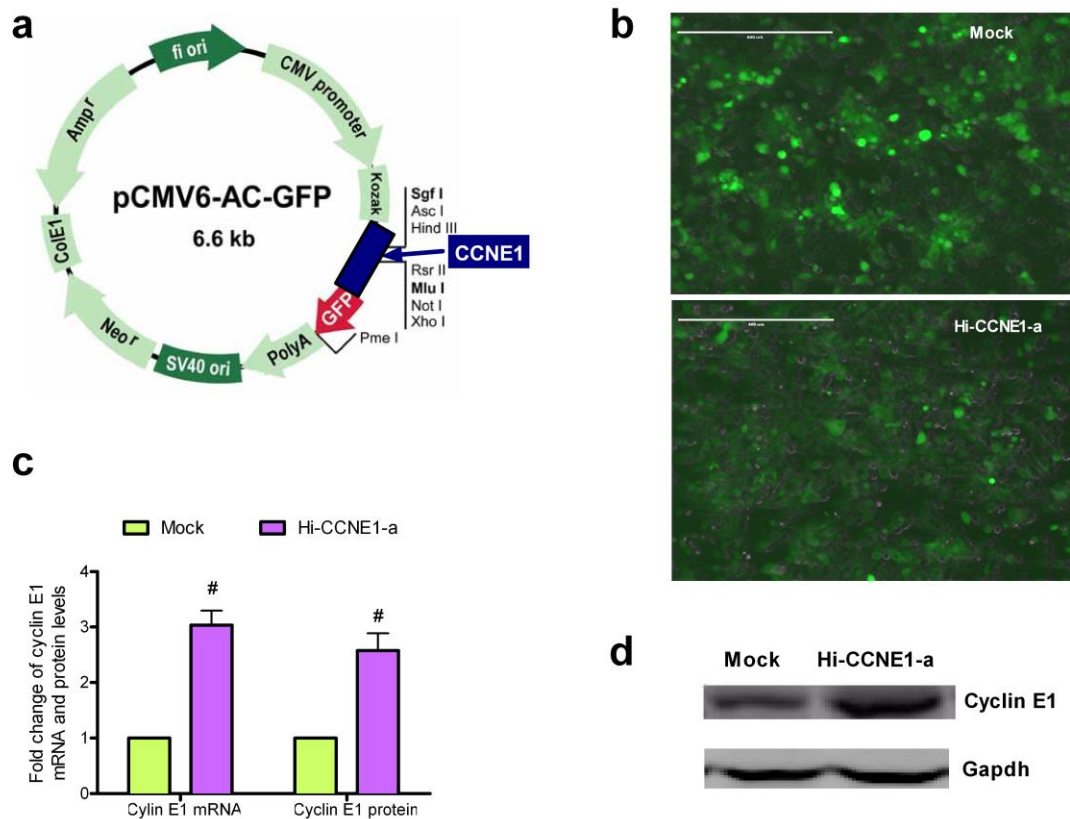

**Figure S5:** To construct cells stably expressing CCNE1, A549 cells were transfected with plasmid DNA and the positive clones stably expressing CCNE1 (Hi-CCNE1a) were selected with neomycin. (a) A clone of the GFP-tagged cDNA (including the UTR) encoding human CCNE1, which was purchased as transfection-ready plasmid DNA from Origene, is illustrated. (b) Representative images of the Hi-CCNE1a cells were captured with an Olympus BX51 microscope with an attached CCD camera (original magnification,  $\times 40$ ). Validation of the stable expression of CCNE1 in Hi-CCNE1a cells. (c) The relative CCNE1 mRNA levels were measured by real-time qPCR and are expressed as fold change after normalization to the internal control, 18S rRNA (top row). Mean  $\pm$  SEM,  $n = 3$  (# $P < 0.01$  vs. control siRNA). GAPDH was used as the loading control for immunoblotting to determine cyclin E1 protein levels. (d) A result representative of three independent experiments is shown.
